# Supplementary material for: Formation of False Context Fear Memory Is Regulated by Hypothalamic Corticotropin-Releasing Factor in Mice
Source: MDPI journal article supplement (doi:10.3390/ijms23116286), 2022-06-03

Revised version of Manuscript ID: ijms-1718457 for *Int. J. Mol. Sci.* (version 5.22.2022)

**Title:** Formation of false context fear memory is regulated by hypothalamic corticotropin-releasing factor in mice

**Authors:** Emi Kasama<sup>1</sup>, Miho Moriya<sup>1</sup>, Ryuma Kamimura<sup>1</sup>, Tohru Matsuki<sup>2\*</sup>, Kenjiro Seki<sup>1\*</sup>

**Affiliations:** <sup>1</sup>Department of Pharmacology, School of Pharmaceutical Science, Ohu University, 31-1 Misumido, Tomitamachi, Koriyama, Fukushima 963-8611, Japan

<sup>2</sup>Department of Cellular Pathology, Institute for Developmental Research, Aichi Developmental Disability Center, Kasugai, Aichi 480-0392, Japan

**\*Corresponding authors:**

Kenjiro Seki, Ph.D., 31-1 Misumido, Tomitamachi, Koriyama, Fukushima 963-8611, Japan

Tel.: +81-24-932-9179, E-mail: [k-seki@pha.ohu-u.ac.jp](mailto:k-seki@pha.ohu-u.ac.jp)

Tohru Matsuki, Ph.D., Kasugai, Aichi 480-0392, Japan

Tel.: +81-568-88-0811, E-mail: [matsukit@inst-hsc.jp](mailto:matsukit@inst-hsc.jp)

## Supplementary Materials

### Methods and Materials

Mice were placed in Box A for 5 min with CS (group A-A CS (+)) or without CS (group A-A CS (-)). Then, 24 h later, the mice were re-exposed to Box A for 2.5 min. Mice were placed in Box A for 5 min with CS (group ABA CS (+)) or without CS (group ABA CS (-)), and 3 h later, the mice were exposed to Box B for 2.5 min. After an additional 24 h, the ABA CS (+) and ABA CS (-) groups of mice were re-exposed to Box A for 2.5 min. Minimum freezing detection using ANY-maze software was 1 s in each box. The central zone was defined as the middle area (172.5 × 172.5 mm) of the arena in Box B. The distance traveled (m) in the central zone was recorded using the ANY-maze software.

### Statistical analysis

Statistical analyses were performed using the EZR (Easy R) software [1] (version 1.38; Saitama, Japan) for the two-way repeated measures ANOVA test. The BellCurve software for Excel (version 3.20). [2] was used as appropriate. Welch's *t*-test was used for

**Suppl. Fig. S1C.** Two-way repeated measures ANOVA, followed by Tukey's multiple comparison test and the paired *t*-test between 3 and 24 h in Box B, was performed for **Fig. S1D.** All data presented as bars indicate the mean ± standard error of the mean (SEM). All analyses were set at  $p < 0.01$  (\*\*) or  $p < 0.05$  (\*).

### Supplementary figure legends

**Figure S1. (A)** Experimental paradigms for contextual fear memory for A-B CS (-), A-B CS (+), ABB CS (-), and ABB CS (+). Electric shocks (1.0 mA for 2 s × 3 times at 100-s intervals) were delivered to the mice for CS (+);. **(B)** Percentage (%) of freezing time during Context A when

the electric shocks (CS (+)) were delivered at 100 s after the mice were placed in the box. Arrows represent electric shock delivery at 180, 280, and 380 s after the mouse was put in the box. Freezing level was recorded every 1 min. **(C)** Bar graphs showing the percentage of freezing time in Box A 24 h in A-A CS (-) (n = 5) and A-B CS (+) (n = 6) mice; **(D)** Bar graphs showing the percentage of freezing time in Box B at 3 h and Box A at 24 h in ABA CS (-) (n = 5) and in ABA CS (+) (n = 14) mice; **(E)** Percentage (%) of freezing level differences between 3 and 24 h in ABB CS (-) (n = 5), ABB CS (+) (n = 14), ABA CS (-) (n = 5), and ABA CS (+) (n = 14) mice. Data are represented by mean  $\pm$  SEM. NS represents no significant difference. \*  $p < 0.05$ ; \*\*  $p < 0.01$ .

**Figure S2.** Construction and characterization of adeno-associated virus (AAV) PHP.eB vectors for knockdown of mouse *Crf* by shRNA system and overexpression of mouse CRF. **(A)** Illustration of the AAV vectors expressing *Crf* shRNAs under the control of U6 promoter. The vectors express GFP as a reporter gene under the control of Chicken  $\beta$ -Actin promoter (CBA pro). **(B)** Illustration of the AAV vector carrying CRF\*-FLAG-T2A-RFP. CRF\* represents the shRNA#2 resistant version. **(C)** Western blotting for expression of CRF\*-FLAG-T2A-RFP carrying AAV plasmid that was transfected to HEK293 cells; **(D)** The knockdown validation of the effective shRNA candidates. #2 shRNA was the most effective, and so was used in further experiments.

**Figure S3.** Original blots showing the detection of FLAG (CRF) and  $\beta$ -actin (full membrane corresponding to cropped blots in Fig. 3C and D indicated by the red dashed line).

## References

1. Kanda, Y. Investigation of the freely available easy-to-use software 'EZR' for medical

- statistics. *Bone Marrow Transplant* **2013**, *48*, 452-458, doi:10.1038/bmt.2012.244.
2. Kimura, K.I.; Minami, R.; Yamahama, Y.; Hariyama, T.; Hosoda, N. Framework with cytoskeletal actin filaments forming insect footpad hairs inspires biomimetic adhesive device design. *Commun Biol* **2020**, *3*, 272, doi:10.1038/s42003-020-0995-0.

Kasama et al, Supplementally Figure S1

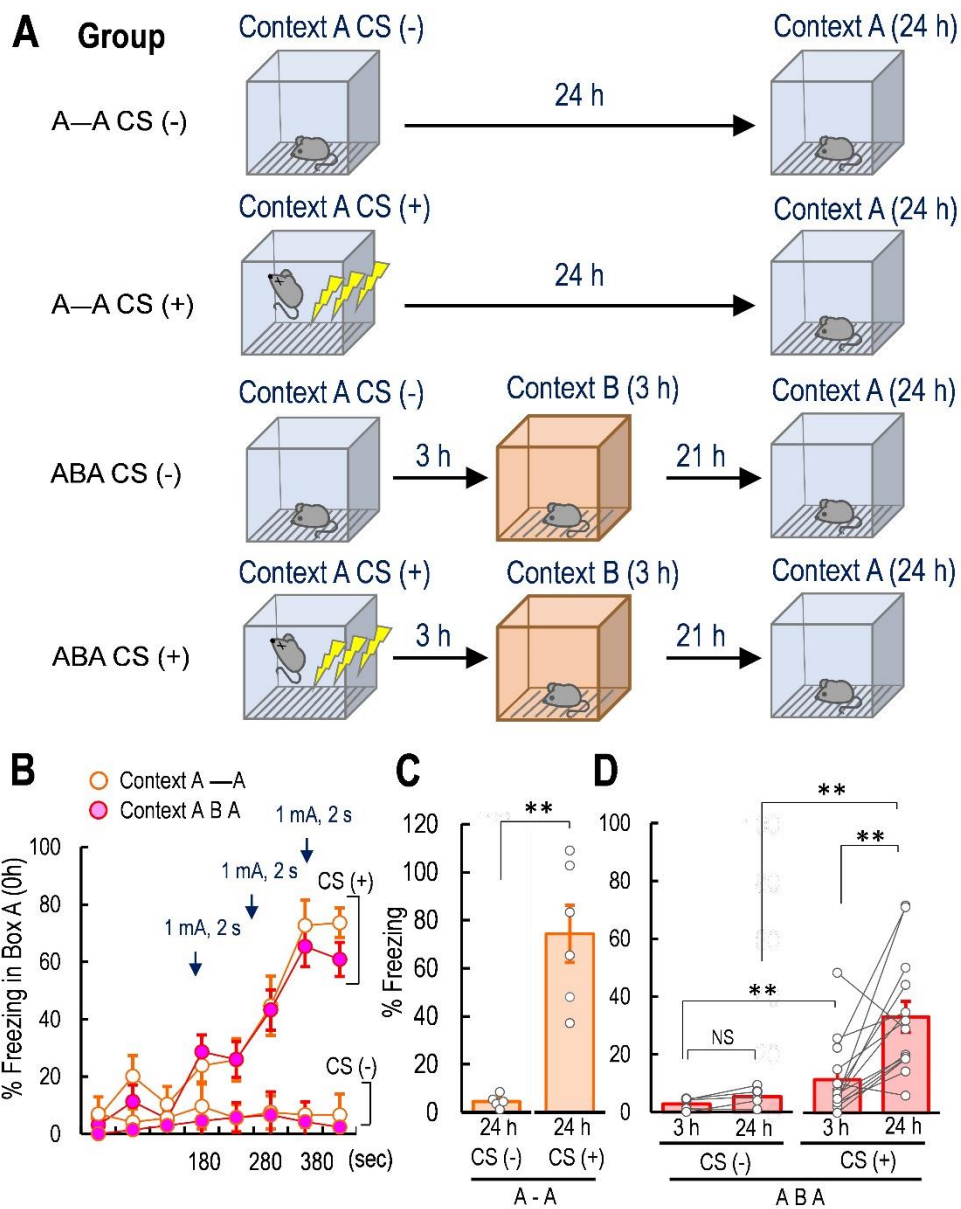

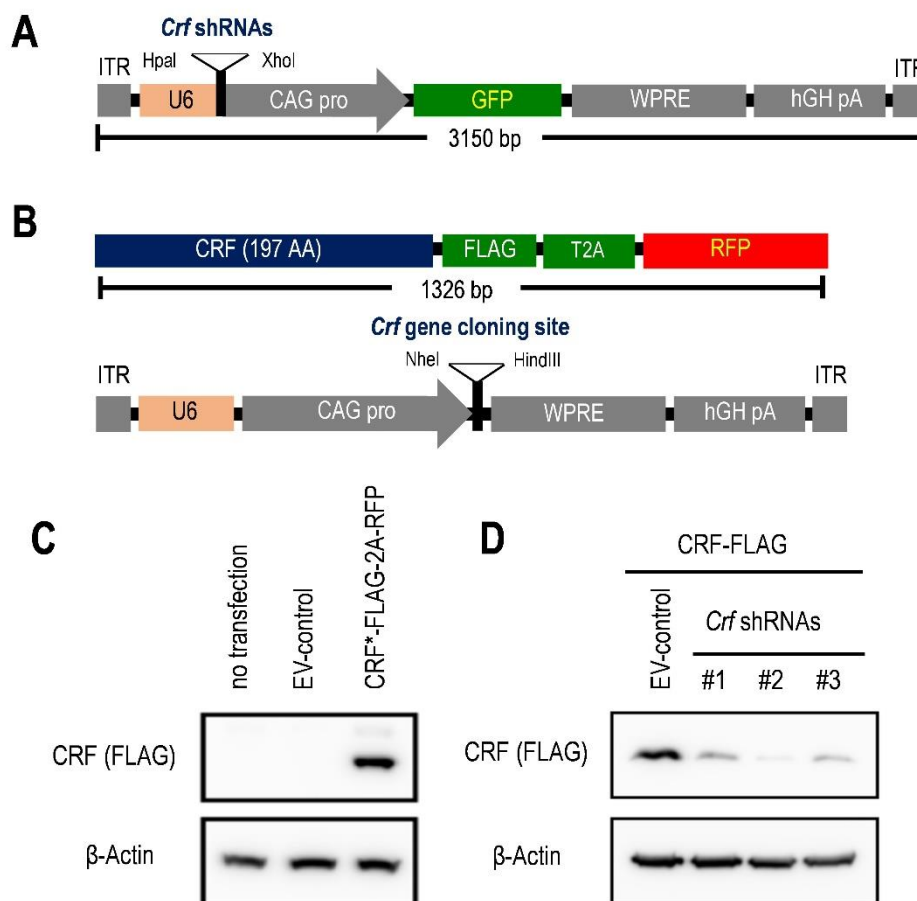

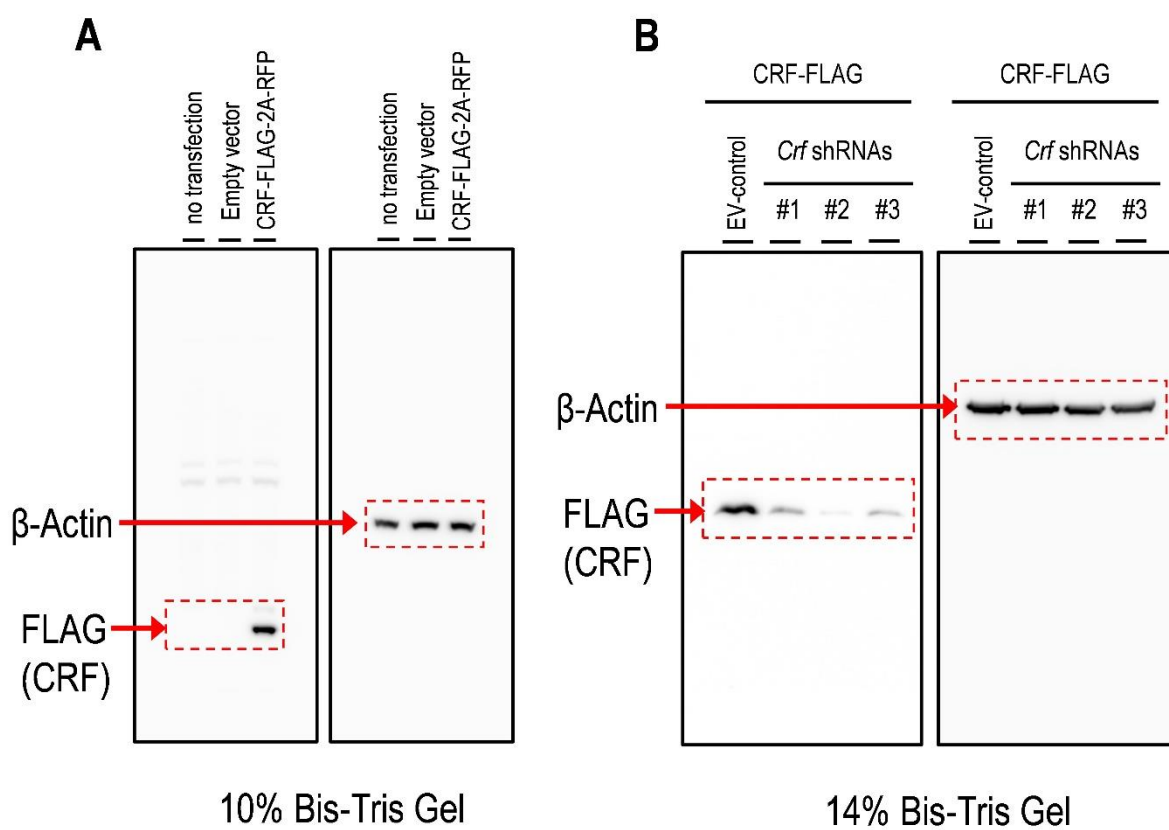

Supplement: s1 [file s1]
